# Supplementary material
Source: PubMed Central journal article supplement (PMC1770853)

### mTau-CstF64 Cold Competition with poly(U) 18 mer

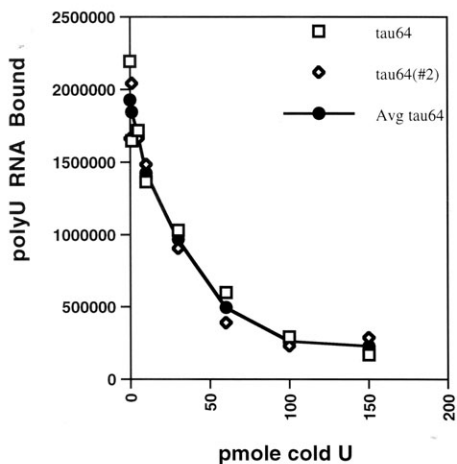

Linear Scale

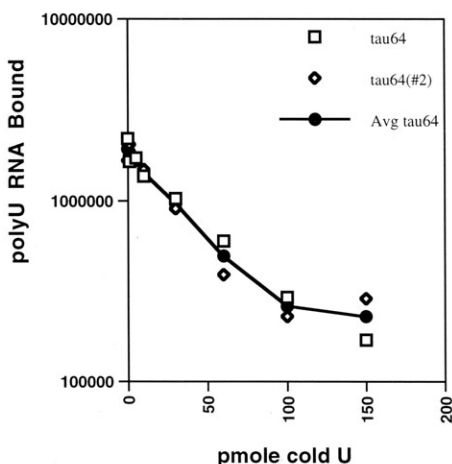

Log Scale

### mCstF64 Cold Competition with poly(U) 18 mer

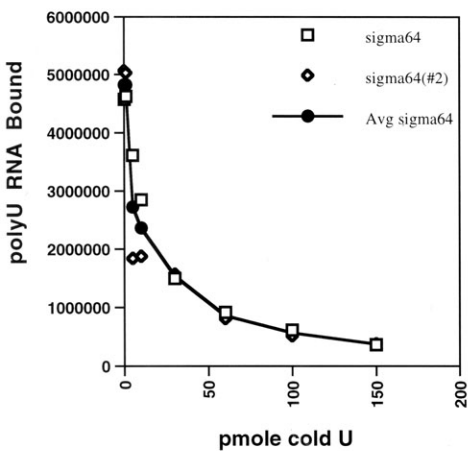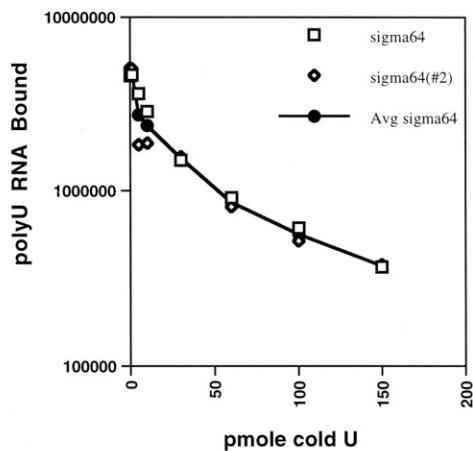

Supplement: bj4010651add.pdf [file bj4010651add.pdf]
